# Supplementary material for: Modeling the Evolution of Casting Defect Closure in Ingots through Radial Shear Rolling Processing
Source: MDPI journal article supplement (doi:10.3390/met14010053), 2023-12-30
Supplement: s1 [file s1]

Based on Gleeble 3800 plastometer plastometric test results, the stress-strain flow curves graphs regarding the 0.5–15 s<sup>-1</sup> strain rates range and 600–1200 °C temperature range were plotted. To construct each curve, 3 tests were carried out. A total of 30 tests were carried out. The flow curves are shown in Figures S1–S4.

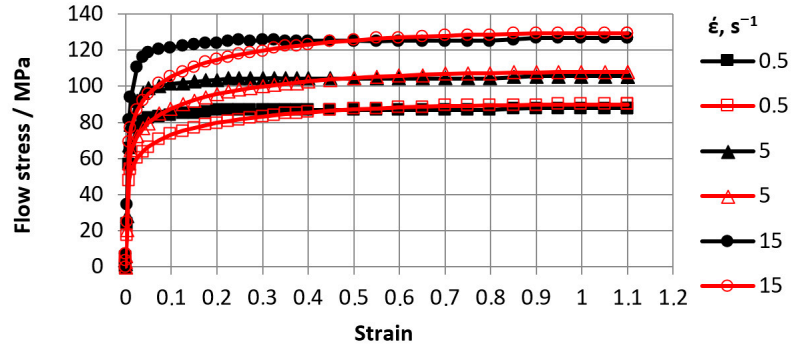

**Figure S1.** Material flow curves obtained at 600 °C: solid markers—indicate the experimental data; transparent markers—indicate the approximation results.

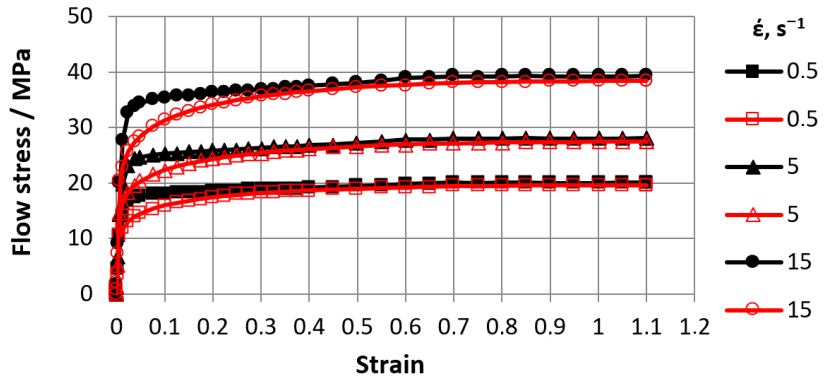

**Figure S2.** Material flow curves obtained at 800 °C: solid markers—indicate the experimental data; transparent markers—indicate the approximation results.

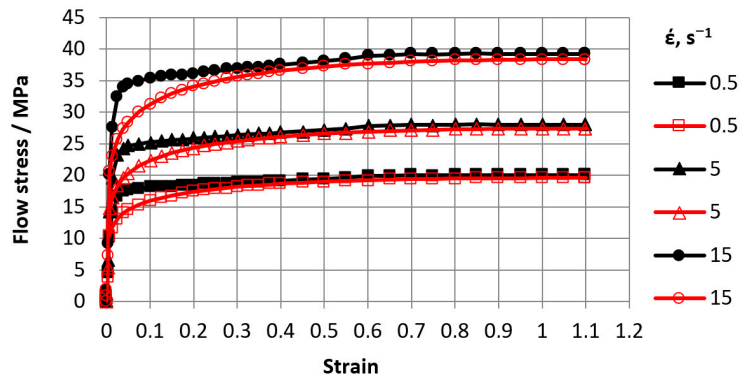

**Figure S3.** Material flow curves obtained at 1000 °C: solid markers—indicate the experimental data; transparent markers—indicate the approximation results.

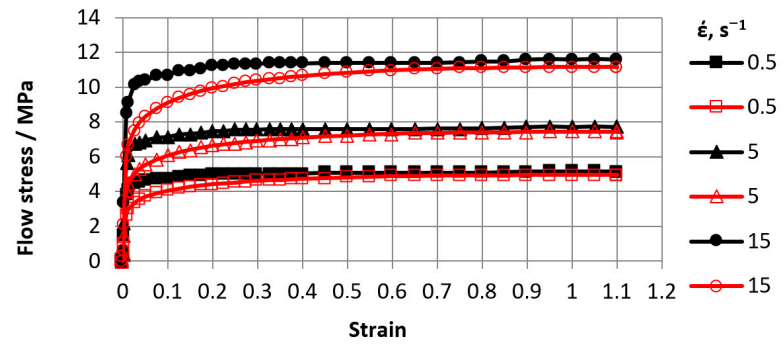

**Figure S4.** Material flow curves obtained at 1200 °C: solid markers—indicate the experimental data; transparent markers—indicate the approximation results.
