# Supplementary material for: Modeling the Evolution of Casting Defect Closure in Ingots through Radial Shear Rolling Processing
Source: MDPI journal article supplement (doi:10.3390/met14010053), 2023-12-30
Supplement: s1 [file s1]

The list of used acronyms:

RSR - Radial Shear Rolling

FEM - Finite Element Method

VAR - Vacuum Arc Remelting

SPD - Severe Plastic Deformation

ECAP - Equal Channel Angular Pressing

HPT - High Pressure Torsion

UFG - Ultra-Fine-Grained [materials]

NPP - Nuclear Power Plant

AISI - American Iron and Steel Institute

DPI - Dots Per Inch

CAD - Computer Aided Design

SEM - Scanning Electron Microscopy
